# Supplementary material for: Cu3P as a novel cathode material for rechargeable aluminum-ion batteries
Source: Royal Society of Chemistry journal article supplement (doi:10.1039/c9ta00762h), 2019-01-01
Supplement: c9ta00762h1.pdf [file c9ta00762h1.pdf]

## Supporting information

### **Cu<sub>3</sub>P as a novel cathode material for rechargeable aluminum-ion batteries**

Gangyong Li, Jiguo Tu,\* Mingyong Wang and Shuqiang Jiao\*

*State Key Laboratory of Advanced Metallurgy, University of Science and Technology Beijing, 100083,*

*P R China. \* E-mails: guo15@126.com (J Tu), sjiao@ustb.edu.cn (S Jiao)*

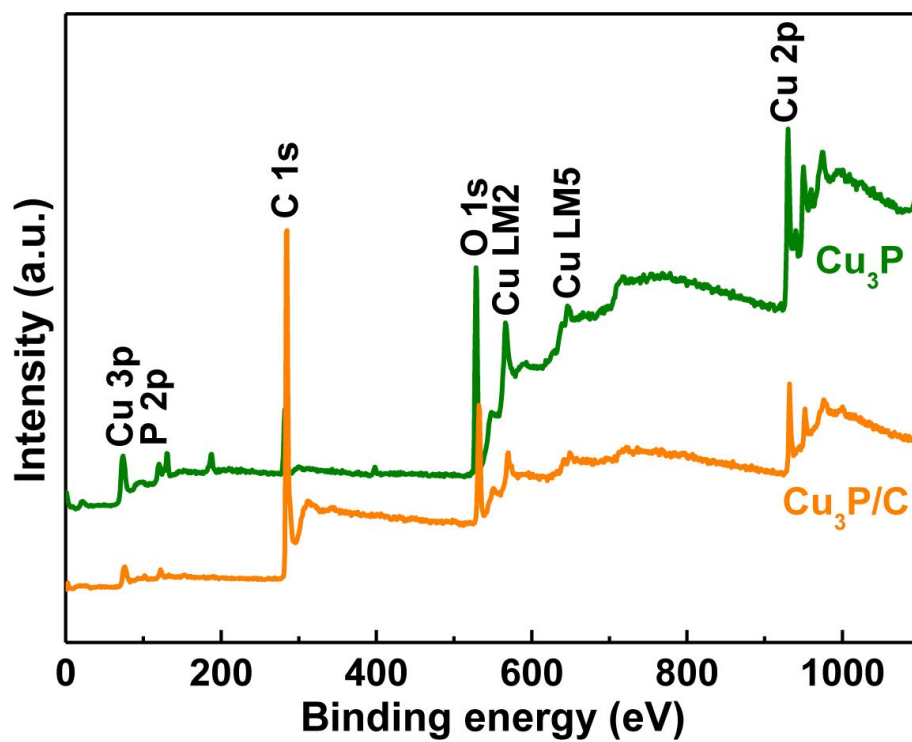

Fig. S1 XPS survey spectra of  $\text{Cu}_3\text{P}$  and  $\text{Cu}_3\text{P}/\text{C}$  composite.

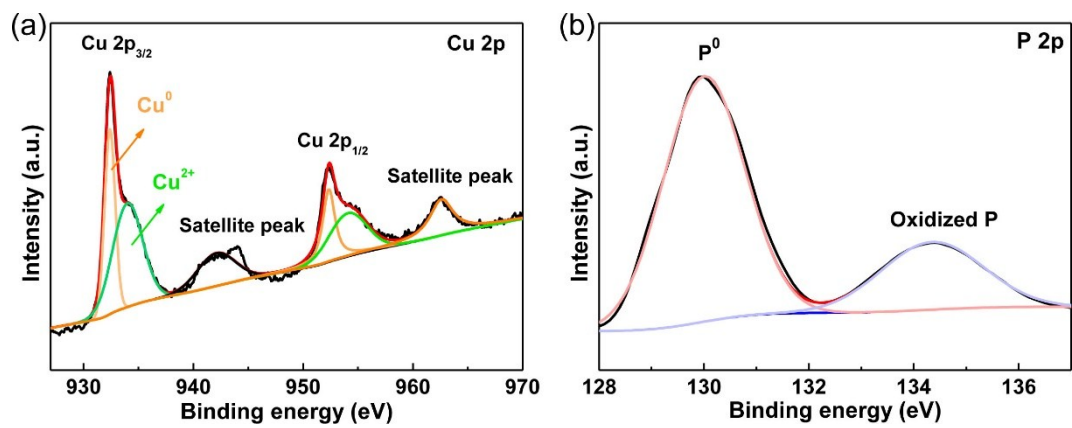

**Fig. S2** (a) Cu 2p XPS spectrum of metallic Cu. (b) P 2p XPS spectrum of red P.

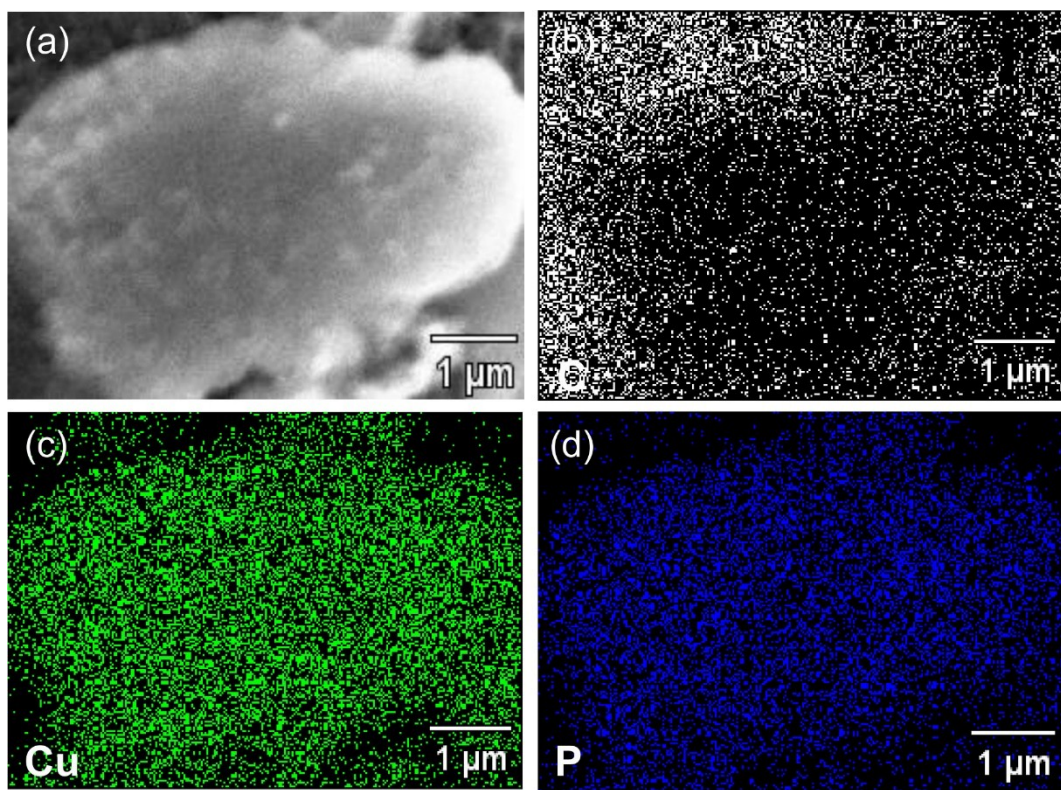

**Fig. S3** SEM image (a) and the corresponding element mapping images of C (b), Cu (c) and P (d) for Cu<sub>3</sub>P/C composite.

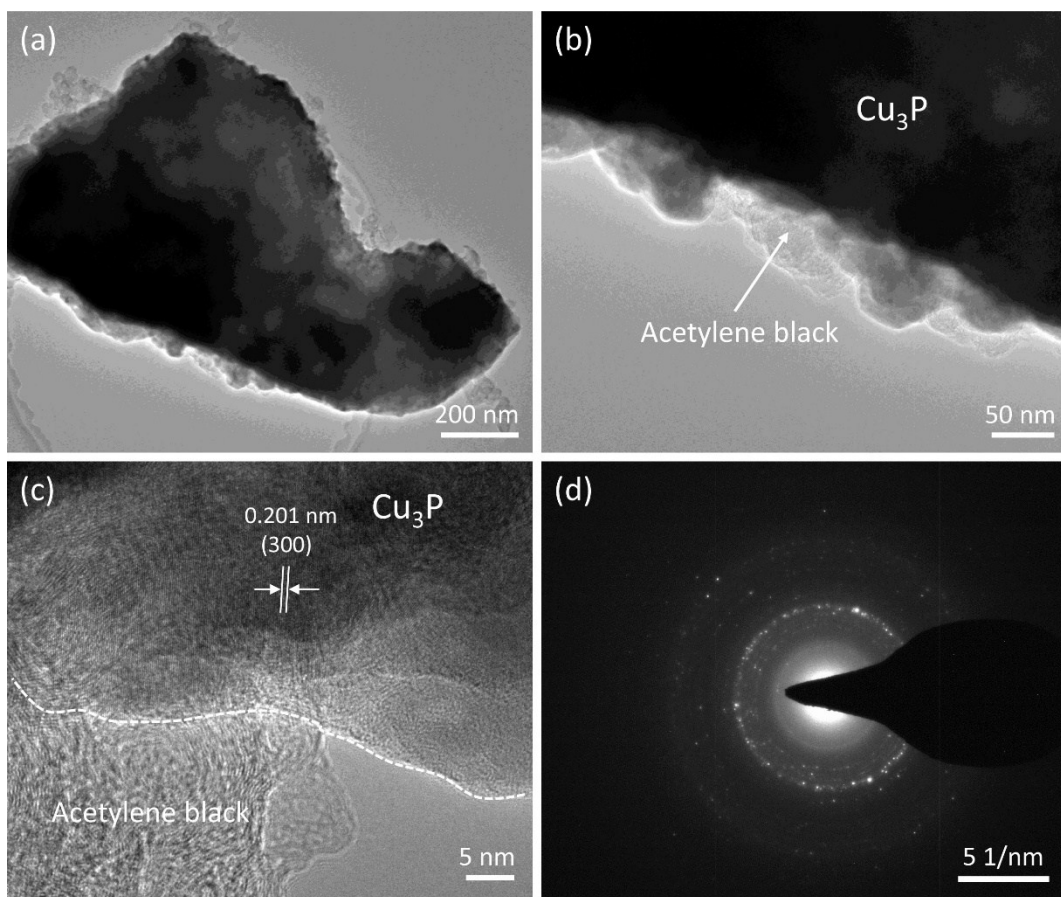

**Fig. S4** (a and b) TEM, (c) HRTEM images and (d) SAED pattern of  $\text{Cu}_3\text{P}/\text{C}$ .

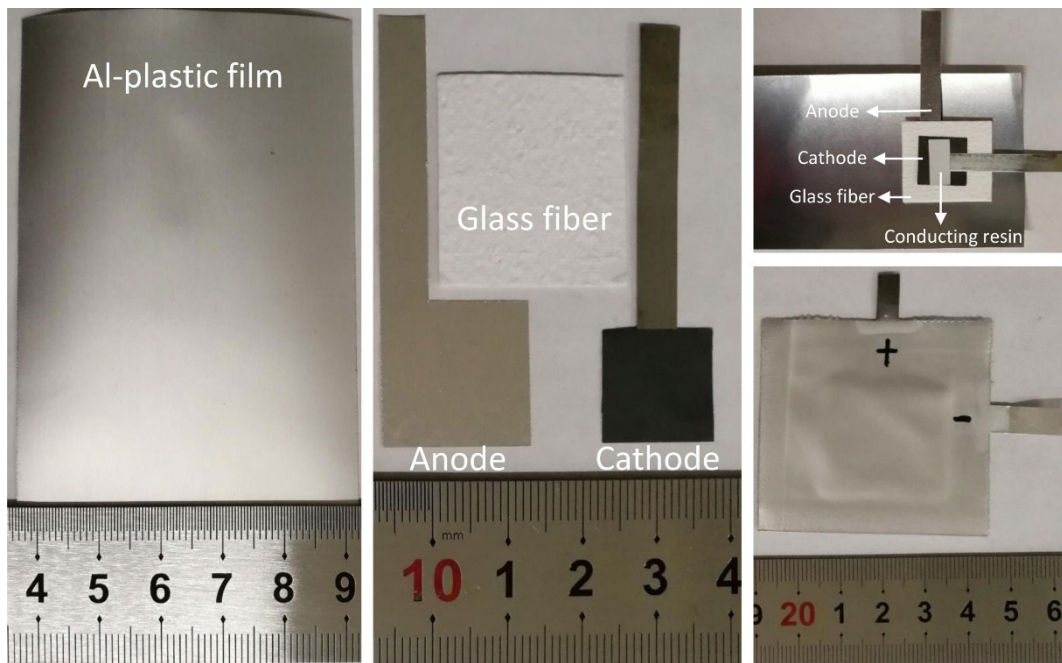

**Fig. S5** Digital photographs showing the materials required for battery assembly.



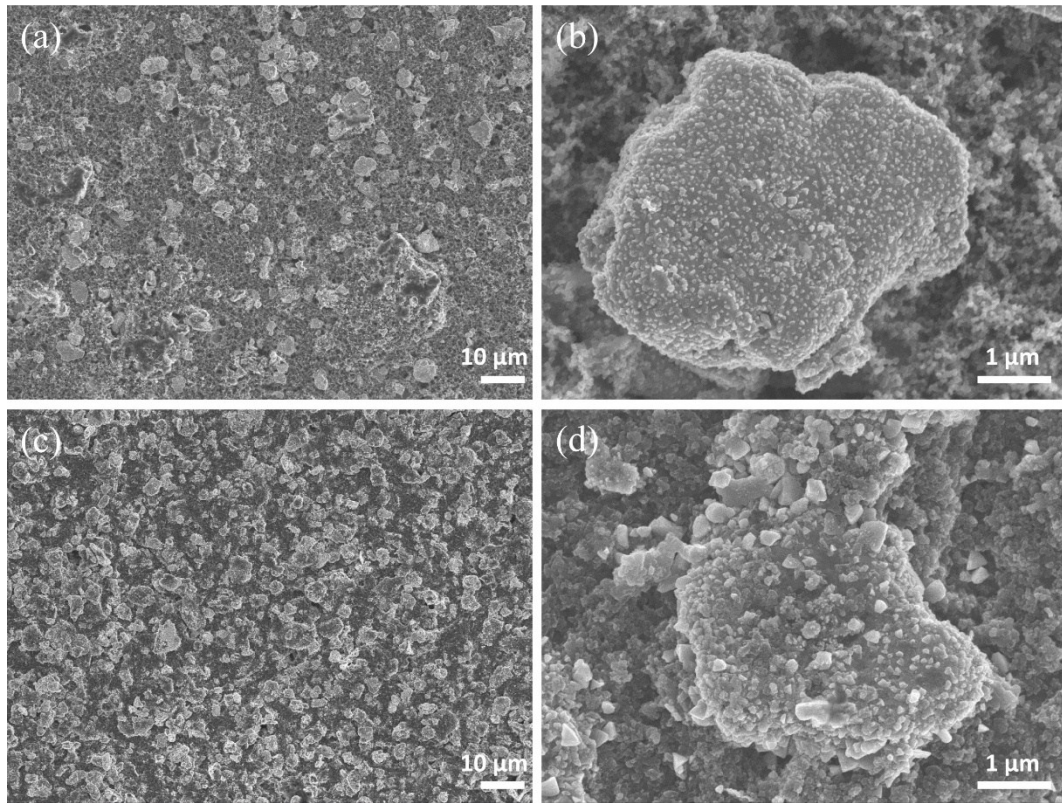

**Fig. S6** SEM images of  $\text{Cu}_3\text{P}$  (a and b) and  $\text{Cu}_3\text{P}/\text{C}$  (c and d) electrodes.

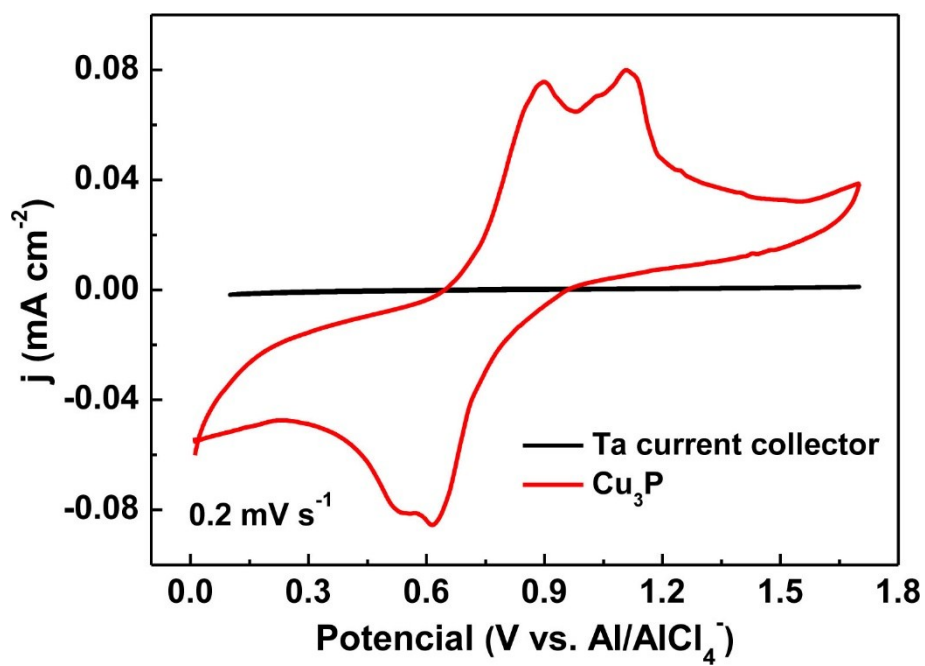

**Fig. S7** CV curves of Ta current collector and  $\text{Cu}_3\text{P}$  at a scanning rate of 0.2 mV s<sup>-1</sup>.



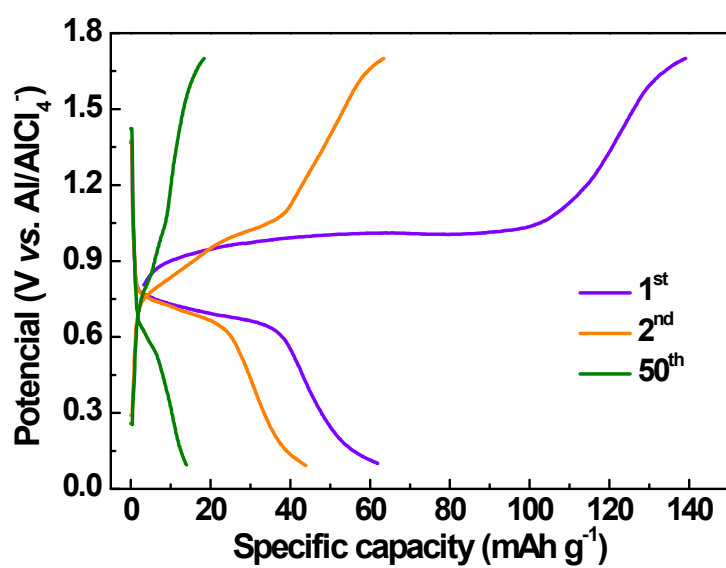

**Fig. S8** Charge-discharge voltage profiles of Cu<sub>3</sub>P for the 1<sup>st</sup>, 2<sup>nd</sup>, and 50<sup>th</sup> cycle at a current density of 50 mA g<sup>-1</sup>.

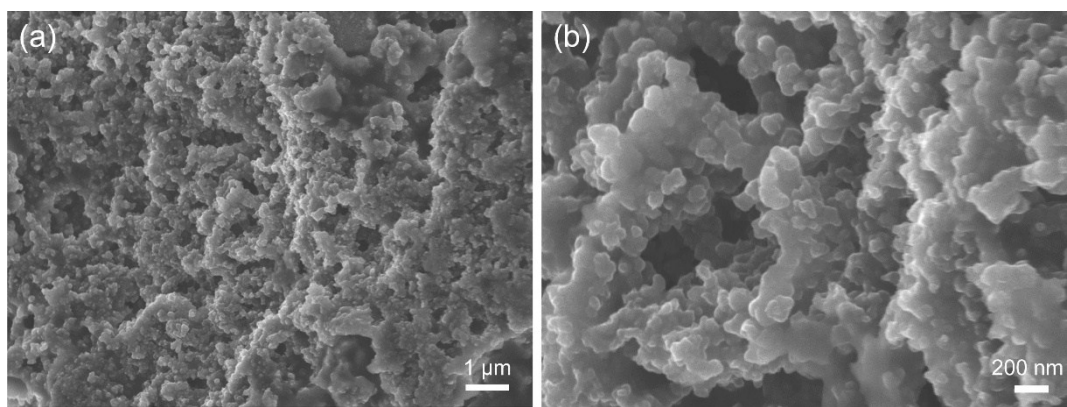

**Fig. S9** SEM images of  $\text{Cu}_3\text{P}$  electrode after 50 cycles at  $50 \text{ mA g}^{-1}$ .

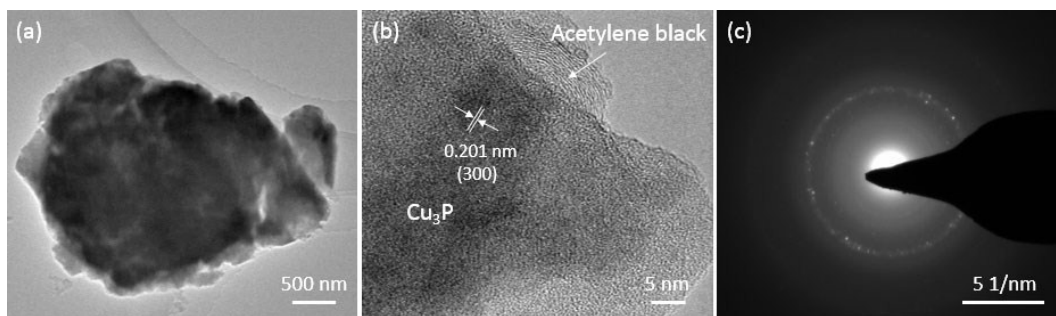

**Fig. S10** (a) TEM and (b) HRTEM images and (c) SAED pattern of Cu<sub>3</sub>P/C electrode after 50 cycles at 50 mA g<sup>-1</sup>.

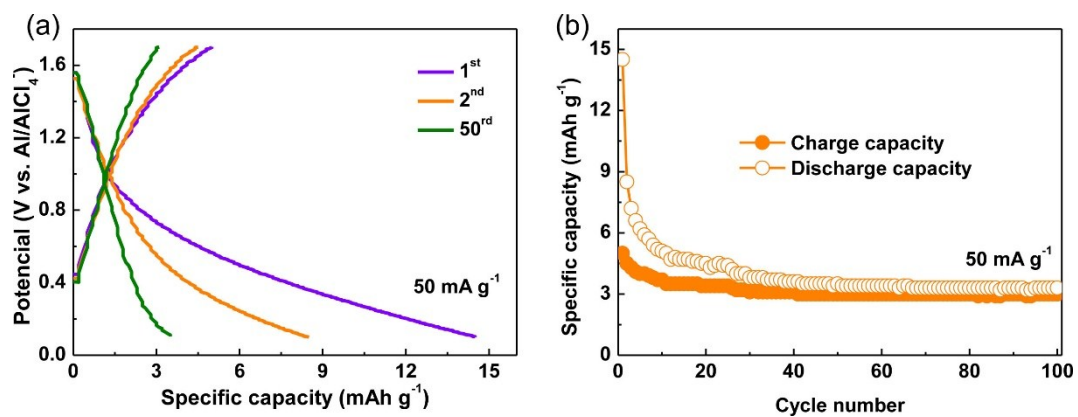

**Fig. S11** (a) Charge-discharge voltage profiles of acetylene black for the 1<sup>st</sup>, 2<sup>nd</sup>, and 50<sup>th</sup> cycle. (b) Cycling performance of acetylene black. Current density: 50 mA g<sup>-1</sup>.

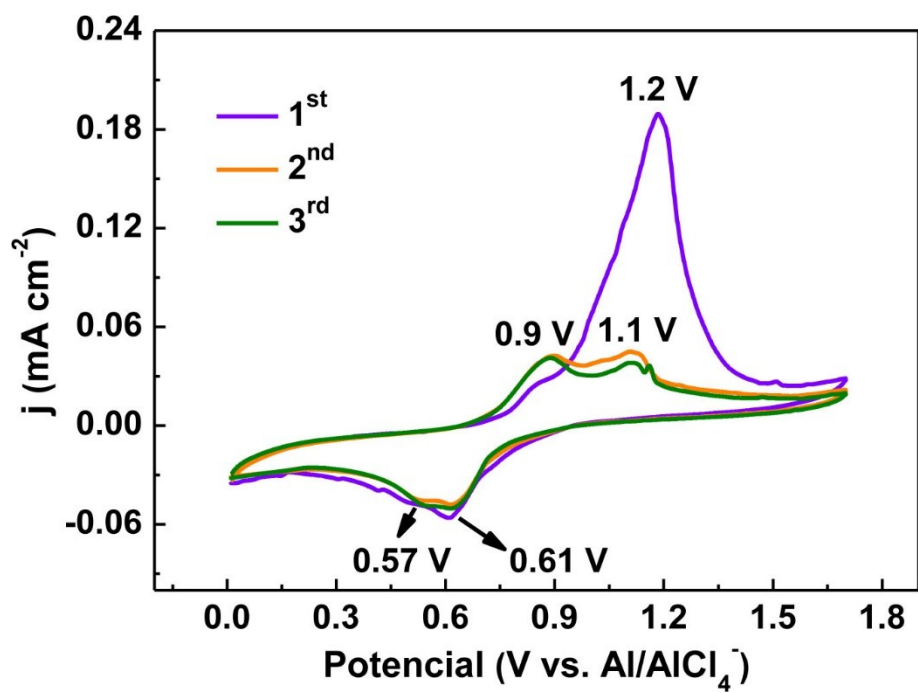

**Fig. S12** CV curves of Cu<sub>3</sub>P for the first three cycles at a scanning rate of 0.2 mV s<sup>-1</sup>.

**Table S1** Comparison of energy storage performance between Cu<sub>3</sub>P/C and other transition metal-based cathode materials recently reported for rechargeable AIBs.

| Cathode materials                                                        | Electrolyte (molar ratio)                                                            | Current density (mA g <sup>-1</sup> ) | Cycling performance                            | Ref.      |
|--------------------------------------------------------------------------|--------------------------------------------------------------------------------------|---------------------------------------|------------------------------------------------|-----------|
| Cu <sub>3</sub> P/C                                                      | AlCl <sub>3</sub> : [EMIm]Cl (1.3 : 1)                                               | 50                                    | 146.7 mAh g <sup>-1</sup> (50 <sup>th</sup> )  | This work |
| Mo <sub>2.5+y</sub> VO <sub>9+z</sub>                                    | AlCl <sub>3</sub> : [EMIm]Cl (1.1 : 1)                                               | 10                                    | 85 mAh g <sup>-1</sup> (25 <sup>th</sup> )     | 1         |
| VO <sub>2</sub>                                                          | AlCl <sub>3</sub> : [EMIm]Cl (1 : 1 with 0.5 wt% C <sub>14</sub> H <sub>14</sub> OS) | 50                                    | 116 mAh g <sup>-1</sup> (100 <sup>th</sup> )   | 2         |
| Ni <sub>3</sub> S <sub>2</sub> @graphene                                 | AlCl <sub>3</sub> : [EMIm]Cl (1.3 : 1)                                               | 100                                   | 60 mAh g <sup>-1</sup> (100 <sup>th</sup> )    | 3         |
| CuS@C                                                                    | AlCl <sub>3</sub> : [EMIm]Cl (1.3 : 1)                                               | 20                                    | 90 mAh g <sup>-1</sup> (100 <sup>th</sup> )    | 4         |
| NiS                                                                      | AlCl <sub>3</sub> : [EMIm]Cl (1.3 : 1)                                               | 200                                   | 104.4 mAh g <sup>-1</sup> (100 <sup>th</sup> ) | 5         |
| TiS <sub>2</sub>                                                         | AlCl <sub>3</sub> : [EMIm]Cl (1.5 : 1)                                               | 5                                     | 65 mAh g <sup>-1</sup> (20 <sup>th</sup> )     | 6         |
| Mo <sub>6</sub> S <sub>8</sub>                                           | AlCl <sub>3</sub> : [EMIm]Cl (1.5 : 1)                                               | 12                                    | 70 mAh g <sup>-1</sup> (50 <sup>th</sup> )     | 7         |
| G-SnS <sub>2</sub>                                                       | AlCl <sub>3</sub> : [EMIm]Cl (1.3 : 1)                                               | 200                                   | 70 mAh g <sup>-1</sup> (100 <sup>th</sup> )    | 8         |
| WO <sub>3-x</sub>                                                        | AlCl <sub>3</sub> : [EMIm]Cl (1.3 : 1)                                               | 100                                   | 64.7 mAh g <sup>-1</sup> (100 <sup>th</sup> )  | 9         |
| VS <sub>4</sub> /rGO                                                     | AlCl <sub>3</sub> : [EMIm]Cl (1.3 : 1)                                               | 100                                   | 80 mAh g <sup>-1</sup> at 100 <sup>th</sup>    | 10        |
| CuO                                                                      | AlCl <sub>3</sub> : [EMIm]Cl (1.3 : 1)                                               | 50                                    | 130.3 mAh g <sup>-1</sup> (100 <sup>th</sup> ) | 11        |
| NiCo <sub>2</sub> S <sub>4</sub>                                         | AlCl <sub>3</sub> : [EMIm]Cl (1.3 : 1)                                               | 100                                   | 143.8 mAh g <sup>-1</sup> (100 <sup>th</sup> ) | [12]      |
| Ni <sub>11</sub> (HPO <sub>3</sub> ) <sub>8</sub> (OH) <sub>6</sub> /rGO | AlCl <sub>3</sub> : [EMIm]Cl (1.3 : 1)                                               | 200                                   | 41.9 mAh g <sup>-1</sup> (1500 <sup>th</sup> ) | [13]      |

## Reference

- 1 W. Kaveevivitchai, A. Huq, S. Wang, M. Park and A. Manthiram, *Small*, 2017, **13**, 1701296.
- 2 W. Wang, B. Jiang, W. Xiong, H. Sun, Z. Lin, L. Hu, J. Tu, J. Hou, H. Zhu and S. Jiao, *Sci. Rep.*, 2013, **3**, 3383.
- 3 S. Wang, Z. Yu, J. Tu, J. Wang, D. Tian, Y. Liu and S. Jiao, *Adv. Energy Mater.*, **2016**, *6*, 1600137.
- 4 S. Wang, S. Jiao, J. Wang, H.S. Chen, D. Tian, H. Lei and D. Fang, *ACS Nano*, 2017, **11**, 469.
- 5 Z. Yu, Z. Kang, Z. Hu, J. Lu, Z. Zhou and S. Jiao, *Chem. Commun.*, 2016, **52**, 10427.
- 6 L. Geng, J. Scheifers, C. Fu, J. Zhang, B. Fokwa and J. Guo, *ACS Appl. Mater. Interfaces*, 2017, **9**, 21251.
- 7 L. Geng, G. Lv, X. Xing and J. Guo, *Chem. Mater.*, 2015, **27**, 4926.
- 8 Y. Hu, B. Luo, D. Ye, X. Zhu, M. Lyu and L. Wang, *Adv. Mater.*, 2017, **29**, 1606132.
- 9 J. Tu, H. Lei, Z. Yu and S. Jiao, *Chem. Commun.*, 2018, **54**, 1343.
- 10 X. Zhang, S. Wang, J. Tu, G. Zhang, S. Li, D. Tian and S. Jiao, *ChemSusChem*, 2018, **11**, 709.
- 11 X. Zhang, G. Zhang, S. Wang, S. Li and S. Jiao, *J. Mater. Chem. A*, 2018, **6**, 3084.
- 12 S. Li, J. Tu, G. Zhang, M. Wang and S. Jiao, *J. Electrochem. Soc.*, 2018, **165**, A3504.
- 13 J. Tu, H. Lei, M. Wang, Z. Yu and S. Jiao, *Nanoscale*, 2018, **10**, 21284.
